# Supplementary material for: The nanomechanical signature of liver cancer tissues and its molecular origin
Source: Royal Society of Chemistry journal article supplement (doi:10.1039/c5nr02192h), 2015-01-01
Supplement: c5nr02192h1.pdf [file c5nr02192h1.pdf]

## Electronic Supplementary Information

### The Nanomechanical Signature of in Liver Cancer Tissues and Its Molecular Origin

Mengxin Tian<sup>#a</sup>, Yiran Li<sup>#c</sup>, Weiren Liu<sup>#a</sup>, Lei Jin<sup>a</sup>, Xifei Jiang<sup>a</sup>, Xinyan Wang<sup>d</sup>, Zhenbin Ding<sup>a</sup>,  
Yuanfei Peng<sup>a</sup>, Jian Zhou<sup>a,b</sup>, Jia Fan<sup>a,b</sup>, Yi Cao<sup>\*c</sup>, Wei Wang<sup>c</sup>, Yinghong Shi<sup>\*a</sup>

Author Affiliations:

*a. Department of Liver Surgery, Liver Cancer Institute, Zhongshan Hospital, Fudan University; Key Laboratory of Carcinogenesis and Cancer Invasion of Ministry of Education, Shanghai, China.*

*b. Institutes of Biomedical Sciences, Fudan University, Shanghai, People's Republic of China.*

*c. Collaborative Innovation Center of Advanced Microstructures, National Laboratory of Solid State Microstructure and Department of Physics, Nanjing 210093, P.R. China.*

*d. National Center for Protein Science Shanghai (NCPSS), Institute of Biochemistry and Cell Biology (SIBCB), Shanghai Institutes for Biological Sciences (SIBS), Chinese Academy of Sciences (CAS), Shanghai, China.*

#. These authors contributed equally to this work

\*Corresponding author

Dr. Ying-Hong Shi

Address: Department of Liver Surgery, Liver Cancer Institute, Zhongshan Hospital, Fudan University, 180 FengLin Road, Shanghai, 200032, China.

Tel.: (+86)-21-64041990-3233; fax: (+86)-21-64037181.

E-mail: shi.yinghong@zs-hospital.sh.cn

Or to Dr. Yi Cao

Address: Department of Physics, Nanjing University, 22 Hankou Road, Nanjing, Jiangsu, 210093, China.

Tel.: (+86)-25-8368 8960; fax: (+86)-25-83595535.

E-mail: caoyi@nju.edu.cn

**Supplementary Tables.**

**Table S1. Nanomechanical results (Young's modulus  $E$ , mean  $\pm$  SD) of different patients associated with pathology diagnosis.**

| Case | Age/gender | AFM elasticity values[kPa] |                 |                 |       | Pathology       |
|------|------------|----------------------------|-----------------|-----------------|-------|-----------------|
|      |            | Peak1                      | Peak2           | Peak3           | Peak4 |                 |
| 1    | 37/female  | 1.08 $\pm$ 1.09            |                 |                 |       | Healthy         |
| 2    | 62/female  | 1.16 $\pm$ 0.20            |                 |                 |       | Healthy         |
| 3    | 72/male    | 1.26 $\pm$ 1.12            |                 |                 |       | Healthy         |
| 4    | 29/female  | 1.46 $\pm$ 0.60            |                 |                 |       | Healthy         |
| 5    | 38/female  | 0.91 $\pm$ 0.44            |                 |                 |       | Healthy         |
| 6    | 67/female  | 1.16 $\pm$ 0.42            |                 |                 |       | Healthy         |
| 7    | 73/female  | 1.32 $\pm$ 0.49            |                 |                 |       | Healthy         |
| 8    | 51/male    | 1.15 $\pm$ 0.51            | 1.90 $\pm$ 0.60 |                 |       | Liver cirrhosis |
| 9    | 77/male    | 1.25 $\pm$ 0.69            | 5.15 $\pm$ 1.11 |                 |       | Liver cirrhosis |
| 10   | 77/male    | 0.95 $\pm$ 0.36            | 1.63 $\pm$ 0.38 |                 |       | Liver cirrhosis |
| 11   | 59/male    | 0.89 $\pm$ 0.35            | 2.10 $\pm$ 0.33 | 3.31 $\pm$ 0.31 |       | Liver cirrhosis |
| 12   | 66/male    | 1.10 $\pm$ 0.20            | 1.85 $\pm$ 0.29 |                 |       | Liver cirrhosis |
| 13   | 52/male    | 1.10 $\pm$ 0.91            | 2.30 $\pm$ 1.55 |                 |       | Liver cirrhosis |

|    |           |             |             |             |              |                 |
|----|-----------|-------------|-------------|-------------|--------------|-----------------|
| 14 | 50/male   | 0.69 ± 0.23 | 2.08 ± 0.73 |             |              | Liver cirrhosis |
| 15 | 64/male   | 1.22 ± 0.60 | 1.92 ± 0.47 | 3.38 ± 1.02 |              | Liver cirrhosis |
| 16 | 46/male   | 1.12 ± 0.36 | 2.33 ± 0.40 |             |              | Liver cirrhosis |
| 17 | 63/male   | 0.96 ± 0.76 | 1.94 ± 0.85 | 3.50 ± 2.50 |              | Liver cirrhosis |
| 18 | 61/male   | 0.80 ± 0.51 | 2.77 ± 0.99 | 6.80 ± 2.36 | 12.28 ± 1.05 | Liver cirrhosis |
| 19 | 59/male   | 1.65 ± 0.47 | 2.75 ± 0.49 |             |              | Liver cirrhosis |
| 20 | 42/male   | 1.45 ± 0.72 | 2.69 ± 0.32 | 4.29 ± 0.84 |              | Liver cirrhosis |
| 21 | 64/male   | 0.60 ± 0.30 | 1.50 ± 0.72 | 3.20 ± 0.41 |              | Liver cirrhosis |
| 22 | 67/female | 0.63 ± 0.32 | 1.36 ± 0.39 |             |              | HCC             |
| 23 | 51/male   | 0.60 ± 0.59 | 1.30 ± 0.45 |             |              | HCC             |
| 24 | 77/male   | 1.05 ± 0.45 | 2.12 ± 1.72 |             |              | HCC             |
| 25 | 77/male   | 0.95 ± 0.32 | 3.05 ± 0.47 | 6.50 ± 2.5  |              | HCC             |
| 26 | 59/male   | 0.62 ± 0.27 |             |             |              | HCC             |
| 27 | 66/male   | 0.42 ± 0.17 | 1.34 ± 0.64 |             |              | HCC             |
| 28 | 52/male   | 0.80 ± 0.40 | 1.60 ± 0.50 |             |              | HCC             |
| 29 | 59/male   | 0.56 ± 0.58 | 4.20 ± 2.58 |             |              | HCC             |
| 30 | 64/male   | 0.40 ± 0.40 | 1.20 ± 0.43 |             |              | HCC             |
| 31 | 63/male   | 0.30 ± 0.99 | 2.30 ± 1.55 |             |              | HCC             |

|    |           |             |             |             |              |                                 |
|----|-----------|-------------|-------------|-------------|--------------|---------------------------------|
| 32 | 73/female | 0.47 ± 0.31 | 1.30 ± 0.36 |             |              | HCC                             |
| 33 | 46/male   | 0.60 ± 0.27 | 2.28 ± 0.68 |             |              | HCC                             |
| 34 | 61/male   | 0.15 ± 0.13 | 1.96 ± 0.57 |             |              | HCC                             |
| 35 | 50/male   | 0.29 ± 0.16 |             |             |              | Recurrent HCC                   |
| 36 | 64/male   | 0.58 ± 0.37 |             |             |              | Recurrent HCC                   |
| 37 | 90/male   | 0.65 ± 0.13 | 2.26 ± 0.60 |             |              | Colon cancer                    |
| 38 | 67/male   | 0.65 ± 0.57 | 1.74 ± 0.60 | 2.93 ± 0.80 | 13.00 ± 5.81 | Esophageal cancer               |
| 39 | 28/male   | 0.51 ± 0.11 | 1.10 ± 0.78 | 6.51 ± 0.57 | 17.35 ± 1.58 | Clear cell renal cell carcinoma |
| 40 | 35/male   | 0.33 ± 0.14 |             |             |              | Papillary renal cell carcinoma  |

| mean $\pm$ SD [kPa] |                 |          |                                         |         |                 |
|---------------------|-----------------|----------|-----------------------------------------|---------|-----------------|
| Normal              |                 |          | HCC (Metastatic and invasive potential) |         |                 |
|                     |                 | Low      |                                         |         | High            |
| L02                 | 0.83 $\pm$ 0.51 | SMMC7721 | 0.98 $\pm$ 0.84                         | MHCC97L | 0.32 $\pm$ 0.58 |
|                     |                 | Huh7     | 1.02 $\pm$ 2.69                         | HCCM97H | 0.51 $\pm$ 0.36 |
|                     |                 |          |                                         | HCCLM3  | 0.22 $\pm$ 0.18 |

**Table S2. Mechanical properties of the HCC cell lines.**

**Table S3. Univariate analyses of prognostic factors associated with OS and TTR (n=751)**

| Variables                               | OS                  |              | TTR                 |              |
|-----------------------------------------|---------------------|--------------|---------------------|--------------|
|                                         | HR(95% CI)          | P            | HR(95% CI)          | P            |
| <b>Univariate analyses†</b>             |                     |              |                     |              |
| Sex (male vs. female)                   | 0.817 (0.586~1.138) | 0.231        | 1.074 (0.805~1.432) | 0.629        |
| Age, years (>50 vs. ≤50)                | 1.052 (0.822~1.346) | 0.689        | 1.186 (0.965~1.458) | 0.105        |
| HBsAg (positive vs. negative)           | 1.164 (0.839~1.616) | 0.363        | 1.310 (0.982~1.748) | 0.066        |
| TB, μmol/L (>17 vs. ≤17)                | 0.819 (0.627~1.070) | 0.143        | 0.944 (0.761~1.171) | 0.600        |
| ALT, U/L (>40 vs. ≤40)                  | 1.116 (0.868~1.434) | 0.391        | 1.064 (0.864~1.311) | 0.556        |
| γ-GT, U/L (≤54 vs. >54)                 | 1.002 (1.001~1.003) | <b>0.000</b> | 1.001 (1.000~1.002) | <b>0.004</b> |
| ALB, g/dl (≤3.5 vs. >3.5)               | 0.525 (0.344~0.801) | <b>0.003</b> | 0.740 (0.506~1.081) | 0.119        |
| AFP, ng/ml (>20 vs. ≤20)                | 1.424 (1.096~1.851) | <b>0.008</b> | 1.391 (1.122~1.724) | <b>0.003</b> |
| Liver cirrhosis (yes vs. no)            | 1.168 (0.830~1.643) | 0.374        | 1.378 (1.025~1.853) | <b>0.034</b> |
| Tumor differentiation (III-IV vs. I-II) | 1.446 (1.118~1.870) | <b>0.005</b> | 1.391 (1.121~1.724) | <b>0.003</b> |
| Tumor encapsulation (none vs. complete) | 1.198 (0.945~1.519) | 0.135        | 1.181 (0.969~1.439) | 0.099        |

|                                    |                     |              |                     |              |
|------------------------------------|---------------------|--------------|---------------------|--------------|
| Tumor size, cm (>5 vs. ≤5)         | 2.080 (1.628~2.657) | <b>0.000</b> | 1.722 (1.401~2.117) | <b>0.000</b> |
| Vascular invasion (yes vs. no)     | 1.462 (1.140~1.870) | <b>0.003</b> | 1.544 (1.252~1.903) | <b>0.000</b> |
| TNM stage (I vs. II III)           | 1.243 (0.735~2.101) | 0.417        | 1.263 (0.784~2.036) | <b>0.338</b> |
| Tumor number (multiple vs. single) | 1.260 (0.855~1.858) | 0.242        | 1.143 (0.791~1.651) | 0.478        |
| mDia1 in tumor (low vs. high)      | 0.772 (0.601~0.991) | <b>0.042</b> | 0.960 (0.774~1.192) | 0.714        |

---

**Abbreviations: TTR time to recurrence; OS, overall survival; AFP:α-fetoprotein; γ-GT, γ-glutamyl transferase; TNM, tumor-nodes-metastasis; HR, hazard ratio; CI, confidential interval; NA, not adopted. Boldface type indicates significant values. †Cox proportional hazards regression.**

**Table S4. The associated primer sequences.**

| Name(Human) | Primer  | Sequence(5'-3')         |
|-------------|---------|-------------------------|
| mDia1       | Forward | GGAGTTACGATAGCCGGAACA   |
|             | Reverse | CTTCTGTCTCCAACATGGTCTTG |
| RhoA        | Forward | AGCCTGTGGAAAGACATGCTT   |
|             | Reverse | TCAAACACTGTGGGCACATAC   |
| RhoB        | Forward | ATCCCCGAGAAGTGGGTCC     |
|             | Reverse | CGAGGTAGTCGTAGGCTTGGA   |
| RhoC        | Forward | GGAGGTCTACGTCCCTACTGT   |
|             | Reverse | CGCAGTCGATCATAGTCTTCC   |
| ROCK1       | Forward | AAGTGAGGTTAGGGCGAAATG   |
|             | Reverse | AAGGTAGTTGATTGCCAACGAA  |
| GADPH       | Forward | AAGGTGAAGGTCGGAGTCAAC   |
|             | Reverse | GGGGTCATTGATGGCAACAATA  |

**Supplementary Figures.**



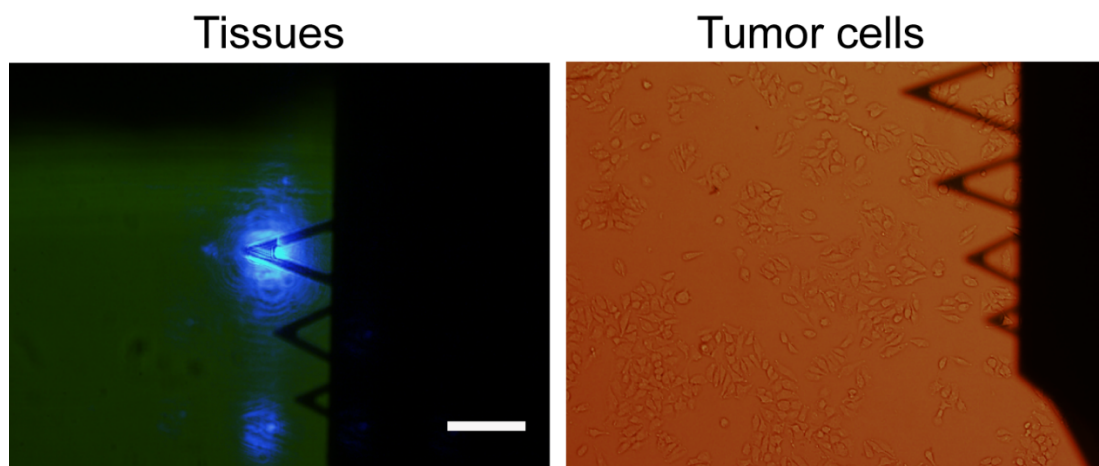

**Figure S1** Measuring the mechanical properties of tissues (left) and cells (right) using IT-AFM.

Scale bar, 200  $\mu\text{m}$ .

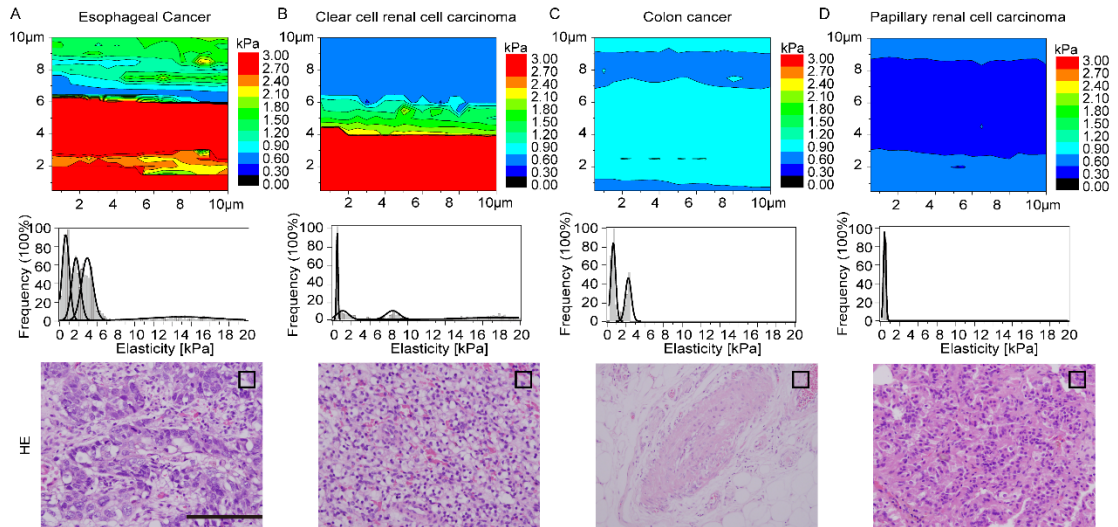

**Figure S2** The downshift of LSP is a common feature shared by many kinds of cancer. A-D, Mechanical features of esophageal cancer, clear cell renal cell carcinoma, colon cancer and papillary renal cell carcinoma, respectively. Top panel: Representative elasticity maps ( $10\ \mu\text{m} \times 10\ \mu\text{m}$ , 100 pixels) of different tissue samples. Middle panel: Distribution of the Young's moduli for each sample. Bottom panel: HE staining for each sample. A dark square ( $10\ \mu\text{m} \times 10\ \mu\text{m}$ , 100 pixels) represents the size of elasticity map in Tri. Masson staining. Scalebar:  $50\ \mu\text{m}$ .

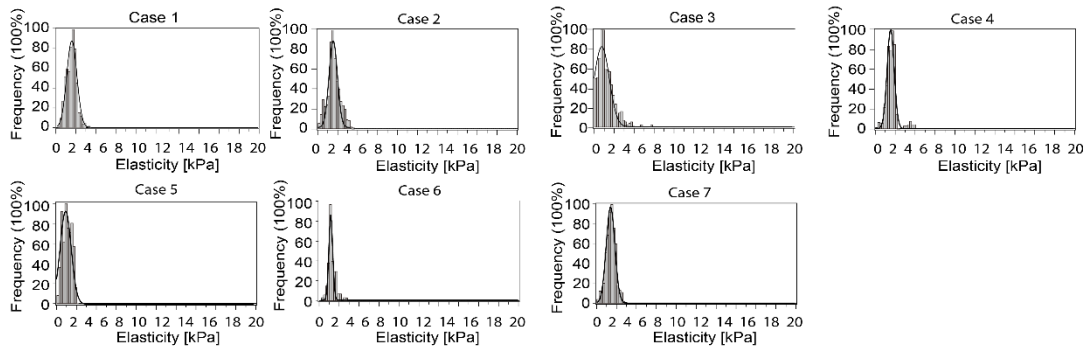

**Figure S3** The elasticity distribution of normal liver tissues measured by IT-AFM.

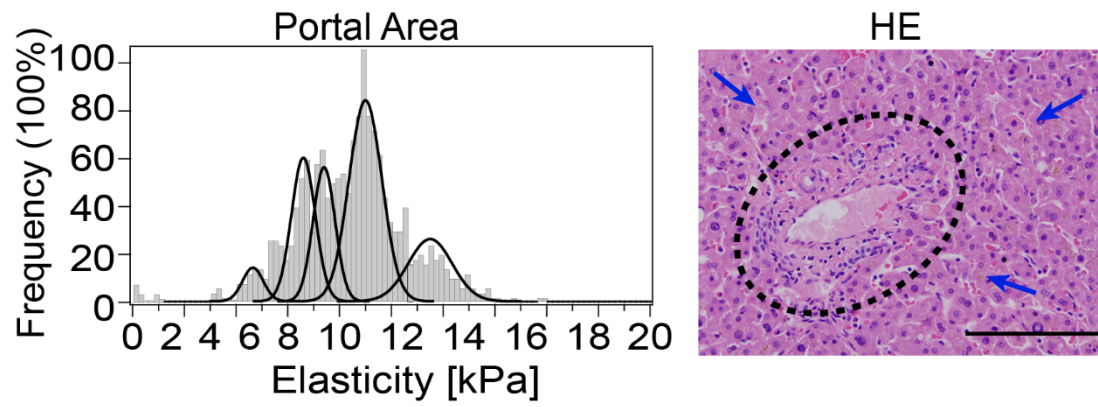

**Figure S4** The mechanical properties of the portal area. (left) The distribution of the Young's moduli of the portal area measured by IT-AFM. (right) HE image of the portal area. The circled area corresponds to the portal area and the arrows indicate the normal tissues. Scale bar, 50  $\mu\text{m}$ .

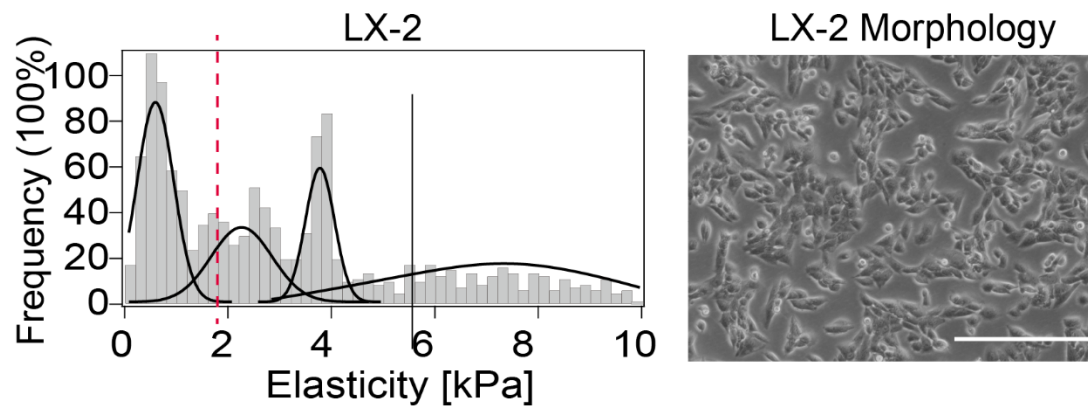

**Figure S5** The mechanical properties of in vitro cultured LX-2 cells measured by IT-AFM. (A) The distribution of the Young's moduli of the portal area measured by IT-AFM. (B) A representative optical image of LX-2 cells cultured on a 6-well petri dish. Scale bar, 50  $\mu\text{m}$ .

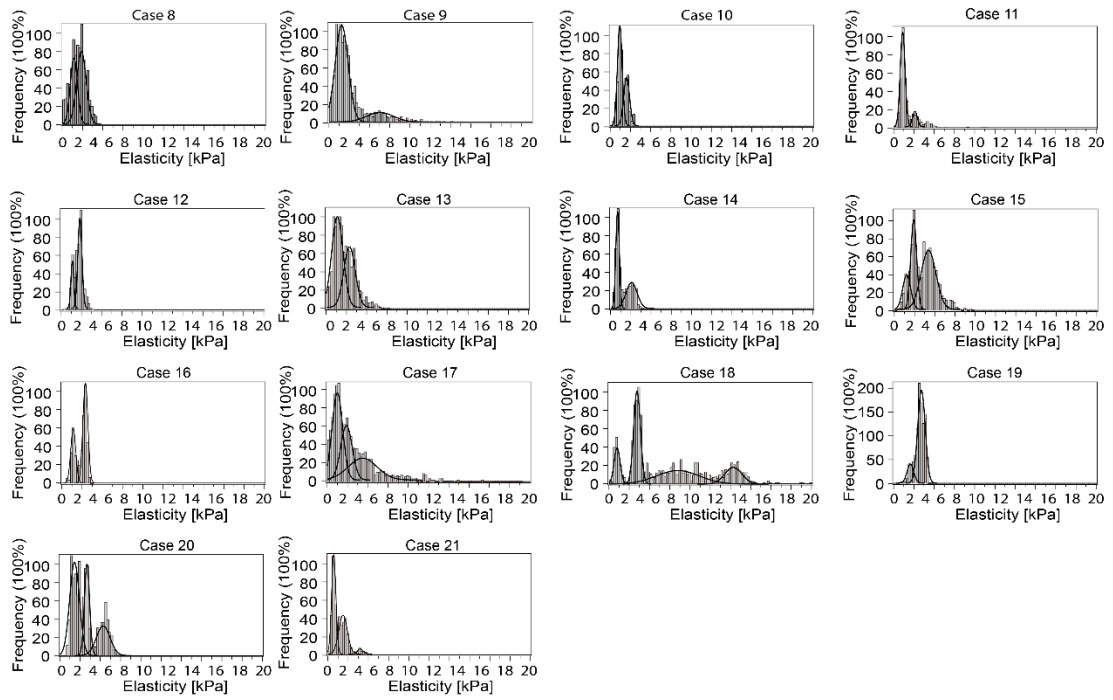

**Figure S6** Elastic histograms showed the elasticity distributions for liver samples with liver cirrhosis.

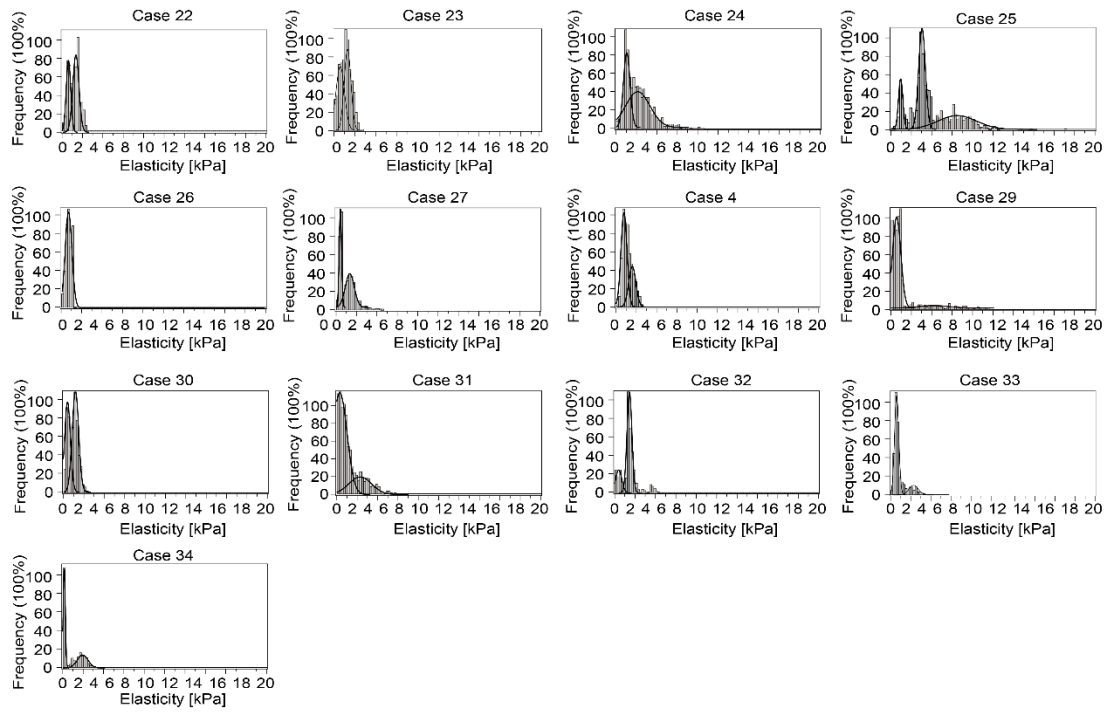

**Figure S7** Post-AFM analysis showed the elasticity distributions for human HCC samples tested.

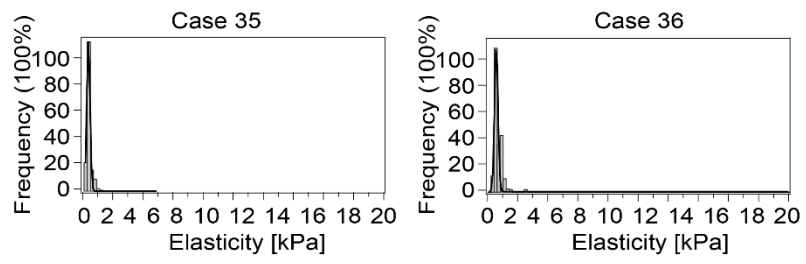

**Figure S8** The elasticity distribution of recurrent HCC.



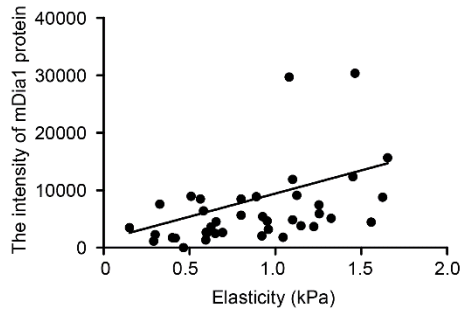

**Figure S9** The scatter plot between mDia1 expression level and its relevant elasticity in detected liver tissues.

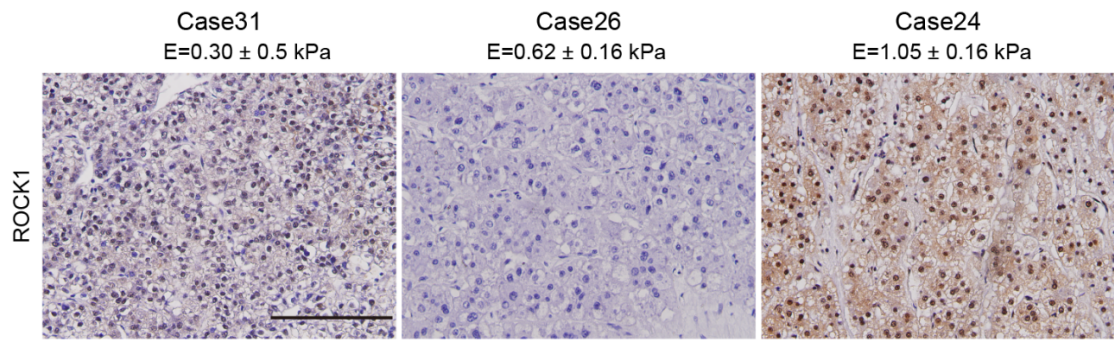

**Figure S10** ROCK1 expression levels in different tissues with various elasticity. The stages of brown staining area represented different expression level. Scale bar, 50  $\mu$ m.

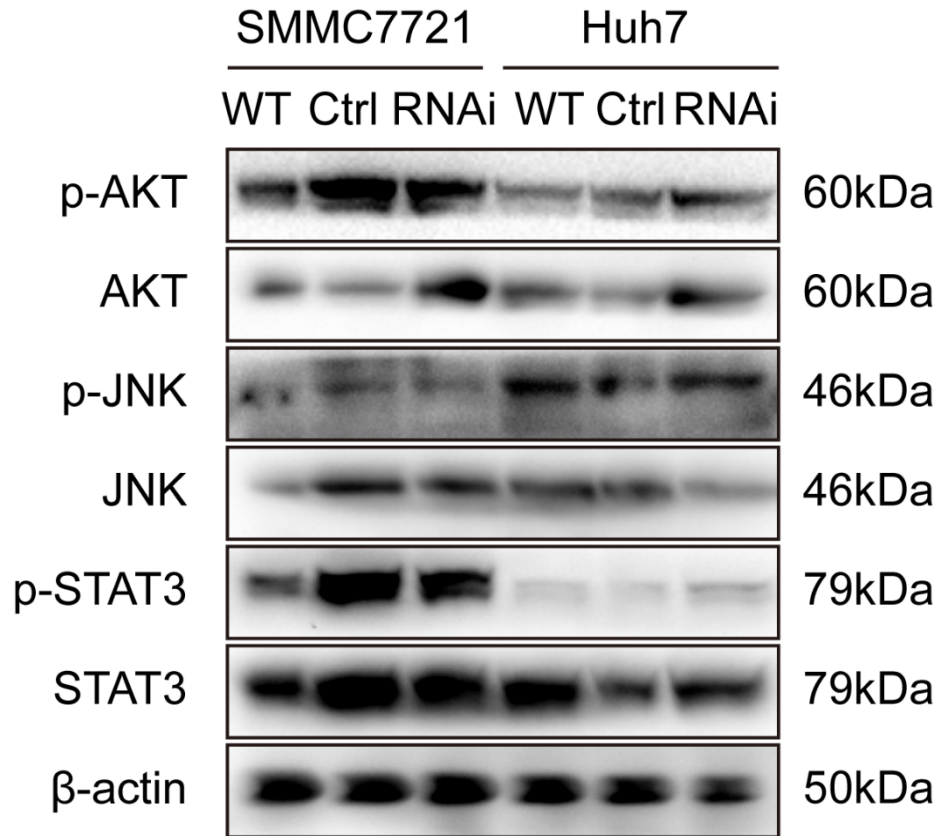

**Figure S11** mDia1 didn't induced phosphorylation of Akt, JNK and STAT3 in HCC cells.

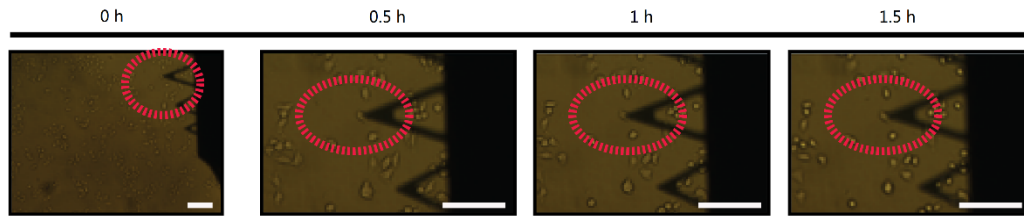

**Figure S12** Optical images for cell survival test. We carried on an experiments on the same cell and the experimental reference is the same. We took optical images after every half hour. From the optical images, we can see the cell remain the same shape and adhered to the petri dish after the indentation measurement. The dead cells typically cannot remain attached on the petri dish and will go to the suspension. The error bars in each image correspond to 200  $\mu\text{m}$ .

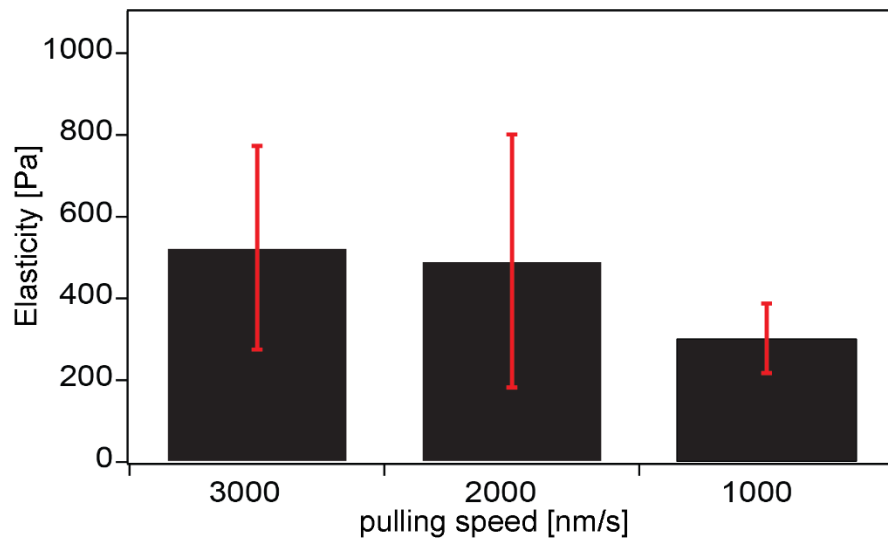

**Figure S13** Loading rate dependent experiment. We found that lower the speed to 2  $\mu\text{m/s}$  could lead to the decrease of the elasticity by 5%.

The unsmoothed elasticity map (10 $\mu$ m  $\times$  10 $\mu$ m)

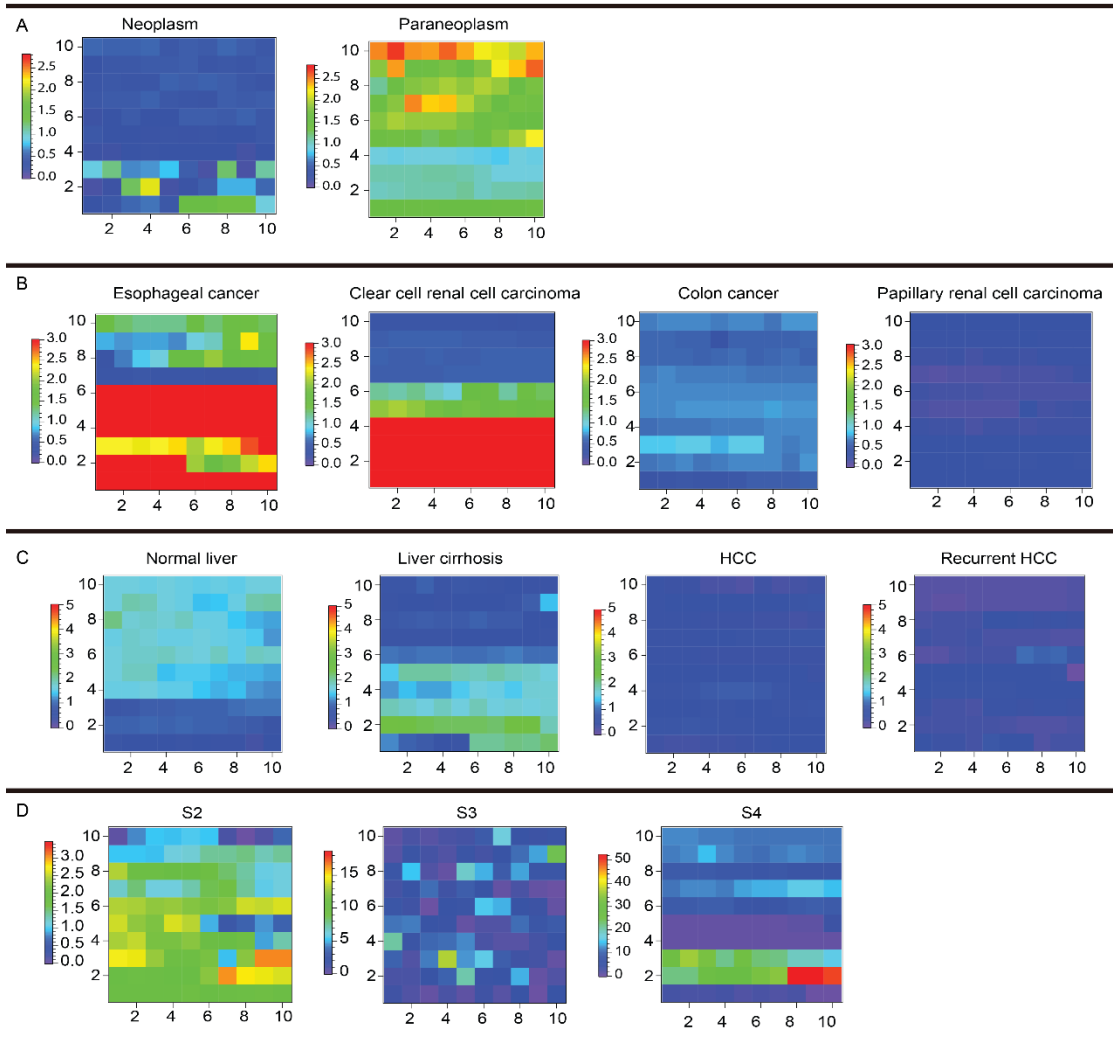

**Figure S14** Unsmoothed data of elasticity map. In manuscript, we used a two-dimensional spline interpolation for better visual presentation of the data. To illustrate how smoothing procedure changes the results, we attached the unsmoothed data here. A correspond to the two elasticity map in Figure 1. B corresponds to the elasticity map in Figure S2. C corresponds to the elasticity map in Figure 2. D corresponds to the elasticity map in Figure 3.

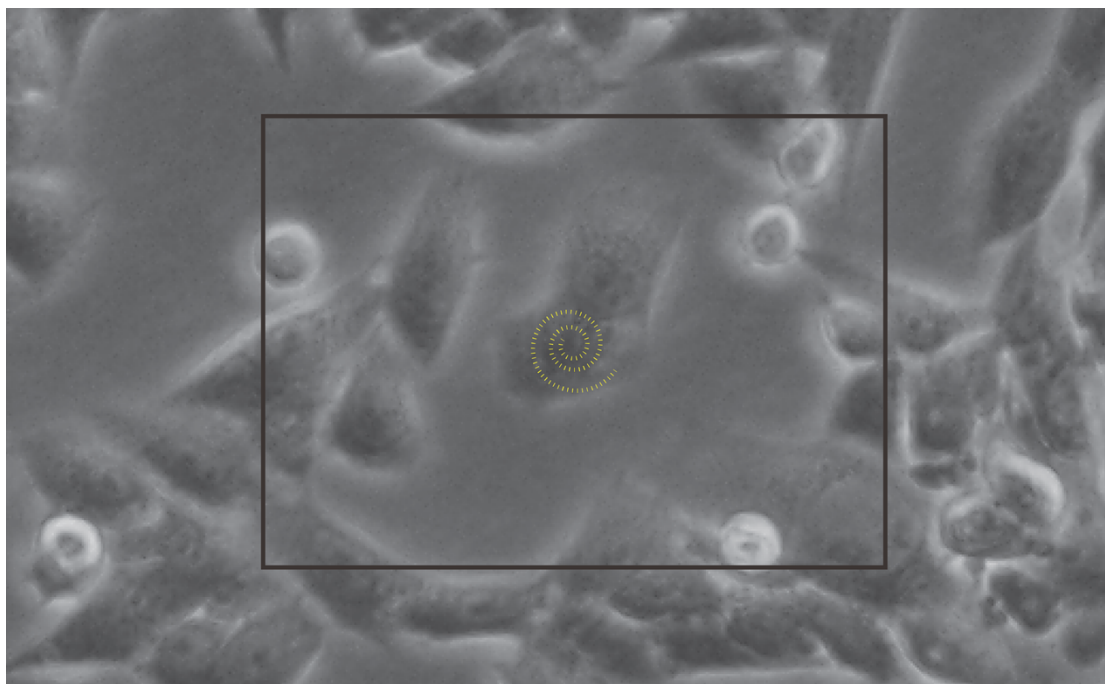

**Figure S15** Test route on cell sample. We set a spiral pattern with rotation angle  $\theta=45^\circ$  and tested 100 spots on this route.
